# Supplementary material for: Placental H3K27me3 establishes female resilience to prenatal insults
Source: PubMed Central journal article supplement (PMC6028627; doi:10.1038/s41467-018-04992-1), 2018-07-02
Supplement: 41467_2018_4992_MOESM1_ESM.pdf [file 41467_2018_4992_MOESM1_ESM.pdf]

## Supplementary Information

Placental H3K27me3 establishes female resilience to prenatal insults

Nugent *et al.*

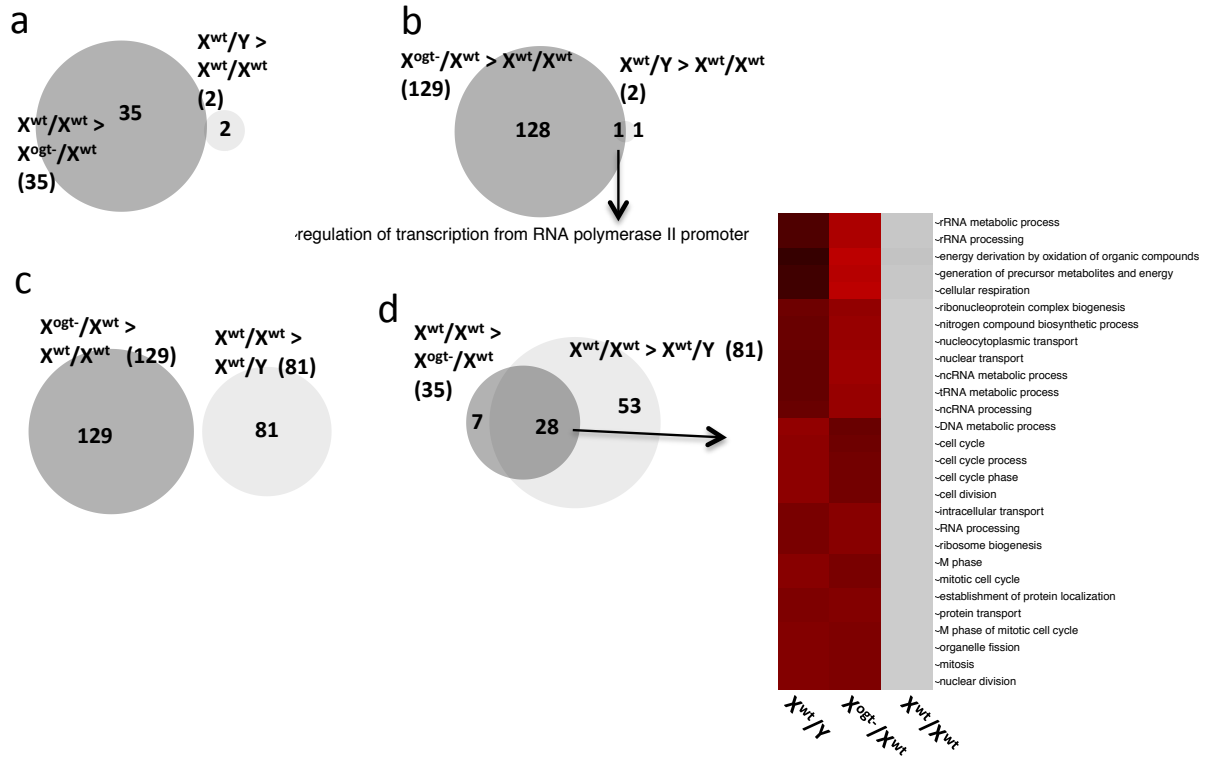

**Supplementary Figure 1. Coordinated biological processes associated with differential trophoblast gene expression at E12.5** **a**, There were no common GO gene sets that were enriched in  $X^{wt}/X^{wt}$  relative to  $X^{ogt-}/X^{wt}$  and enriched in  $X^{wt}/Y$  relative to  $X^{wt}/X^{wt}$ . **b**, The GO biological process “regulation of transcription from RNA pol. II promoter” was enriched in both  $X^{ogt-}/X^{wt}$  and  $X^{wt}/Y$  relative to  $X^{wt}/X^{wt}$  trophoblasts. **c**, There were no common GO gene sets that were enriched in  $X^{ogt-}/X^{wt}$  relative to  $X^{wt}/X^{wt}$  and in  $X^{wt}/X^{wt}$  relative to  $X^{wt}/Y$  trophoblasts. **d**, 28 GO biological process (displayed in the heatmap) were enriched in  $X^{wt}/X^{wt}$  trophoblasts relative to both  $X^{ogt-}/X^{wt}$  and  $X^{wt}/Y$ .  $N=3$   $X^{wt}/Y$ ,  $n=4$   $X^{wt}/X^{wt}$ , and  $n=5$   $X^{ogt-}/X^{wt}$  placentas, from 5 individual litters with  $n=1$ /litter/group to control for litter effects.

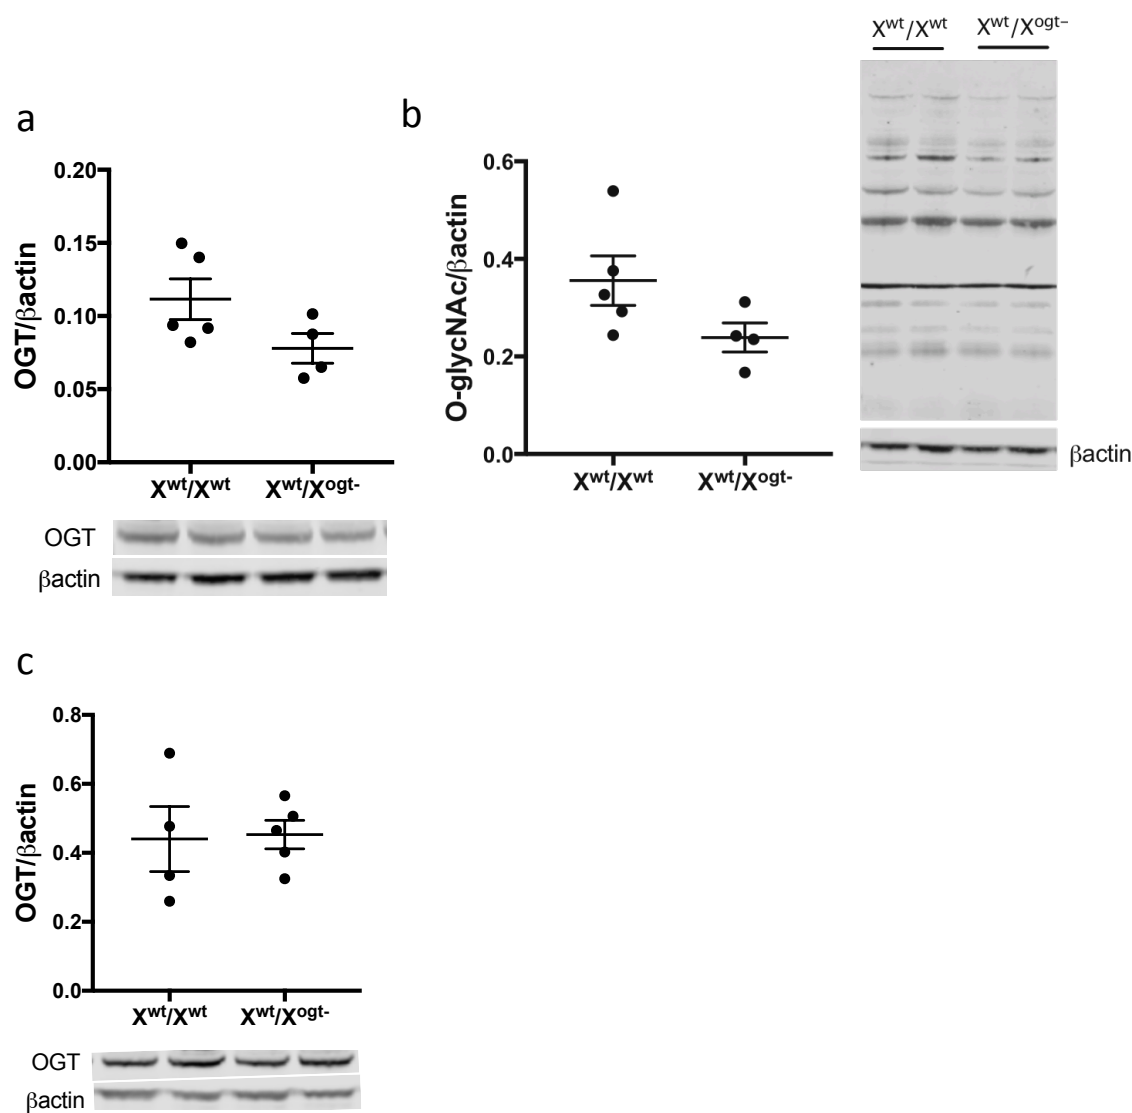

**Supplementary Figure 2. Placental-specific OGT reduction.** **a**, Western blot of OGT ( $t(7)=1.86$ ,  $p=0.0526$ ) and **b**, O-glycNACylated proteins ( $t$ -test,  $t(7)=1.844$ ,  $p=0.0539$ ) on whole cell placental lysates in E12.5 trophoblast  $X^{wt}/X^{wt}$  and  $X^{ogt-}/X^{wt}$  females ( $n=5 X^{wt}/X^{wt}$ ,  $n=4 X^{ogt-}/X^{wt}$  from 4 litters (a maximum of 2/litter/group to control for litter effects)). **c**, OGT in brain whole cell lysates from trophoblast  $X^{wt}/X^{wt}$  and  $X^{ogt-}/X^{wt}$  females ( $t(7)=0.1341$ ,  $p=0.4486$ ;  $n=4 X^{wt}/X^{wt}$ ,  $n=5 X^{ogt-}/X^{wt}$  from 4 litters with a maximum of 2/litter/group to control for litter effects). Bars represent mean  $\pm$  sem.

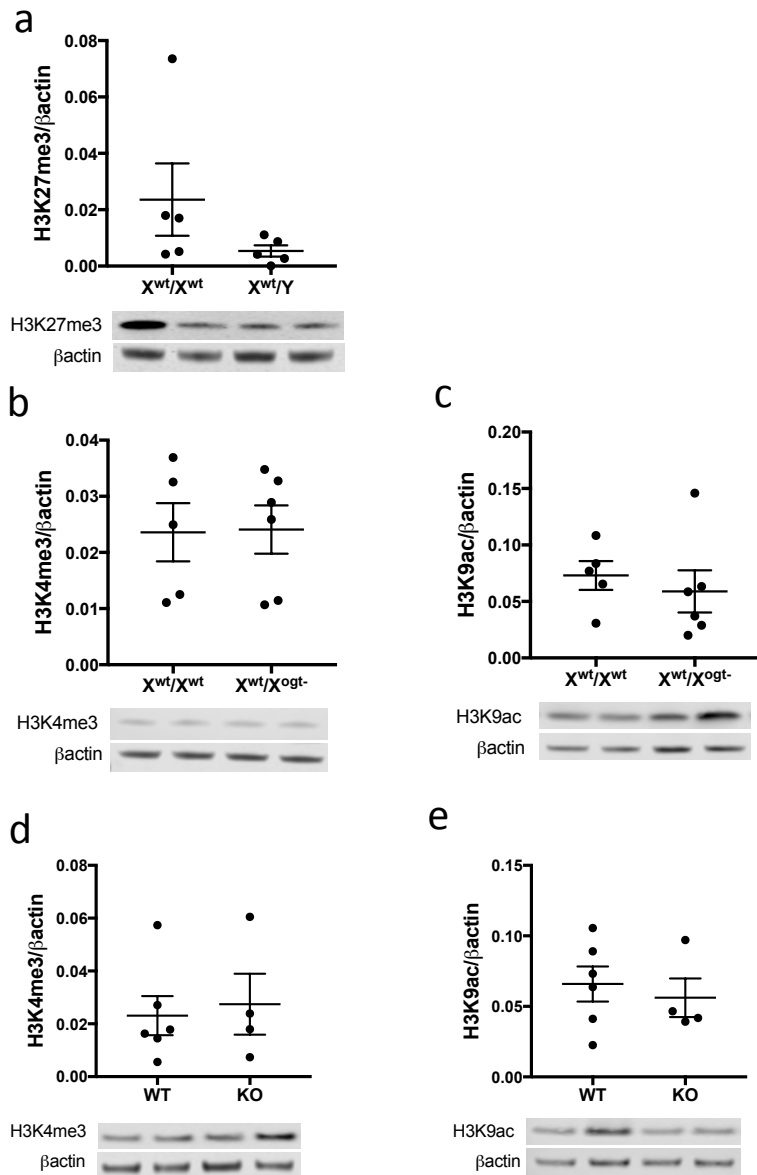

**Supplementary Figure 3. Histone quantification in placenta.** **a**, Western blot of H3K27me3 in placental nuclear extracts from E18.5 trophoblast  $X^{wt}/X^{wt}$  and  $X^{ogt-}/X^{wt}$  females (t-test,  $t(8)=1.407$ ,  $p=0.0986$ ;  $n=5$ /group from 4 litters with a maximum of 2/litter/group to control for litter effects). **b**, Western blot of H3K4me3 ( $t(9)=0.07174$ ,  $p=0.9444$ ) and **c**, H3K9Ac ( $t(9)=0.5947$ ,  $p=0.5667$ ) in placental nuclear extracts from E12.5 trophoblast  $X^{wt}/X^{wt}$  and  $X^{ogt-}/X^{wt}$  females ( $n=5$   $X^{wt}/X^{wt}$ ,  $n=6$   $X^{ogt-}/X^{wt}$  from 7 litters (a maximum of 2/litter/group to control for litter effects)). **d**, Western blot of H3K4me3 ( $t(8)=0.3338$ ,  $p=0.7471$ ) and **e**, H3K9ac ( $t(8)=0.5148$ ,  $p=0.6206$ ) in placental nuclear extracts from E12.5 trophoblast WT and *Ezh2* KO females ( $n=6$  WT,  $n=4$  KO from 6 litters with a maximum of 2/litter/group to control for litter effects). Bars represent mean  $\pm$  sem.

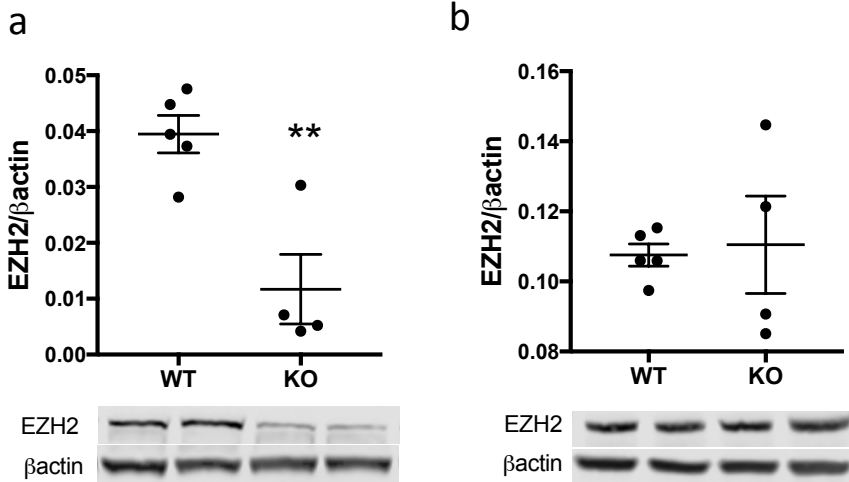

**Supplementary Figure 4. Placenta specific EZH2 reduction.** **a**, Western blot of EZH2 in whole cell placenta (t-test,  $t(7)=4.161$ ,  $p=0.0021$ ) and **b**, brain ( $t(7)=0.2296$ ,  $p=0.4125$ ) lysates from trophoblast WT and *Ezh2* KO E12.5 females ( $n=5$  WT,  $n=4$  KO from 6 litters with a maximum of 2/litter/group to control for litter effects). Bars represent mean  $\pm$  sem.

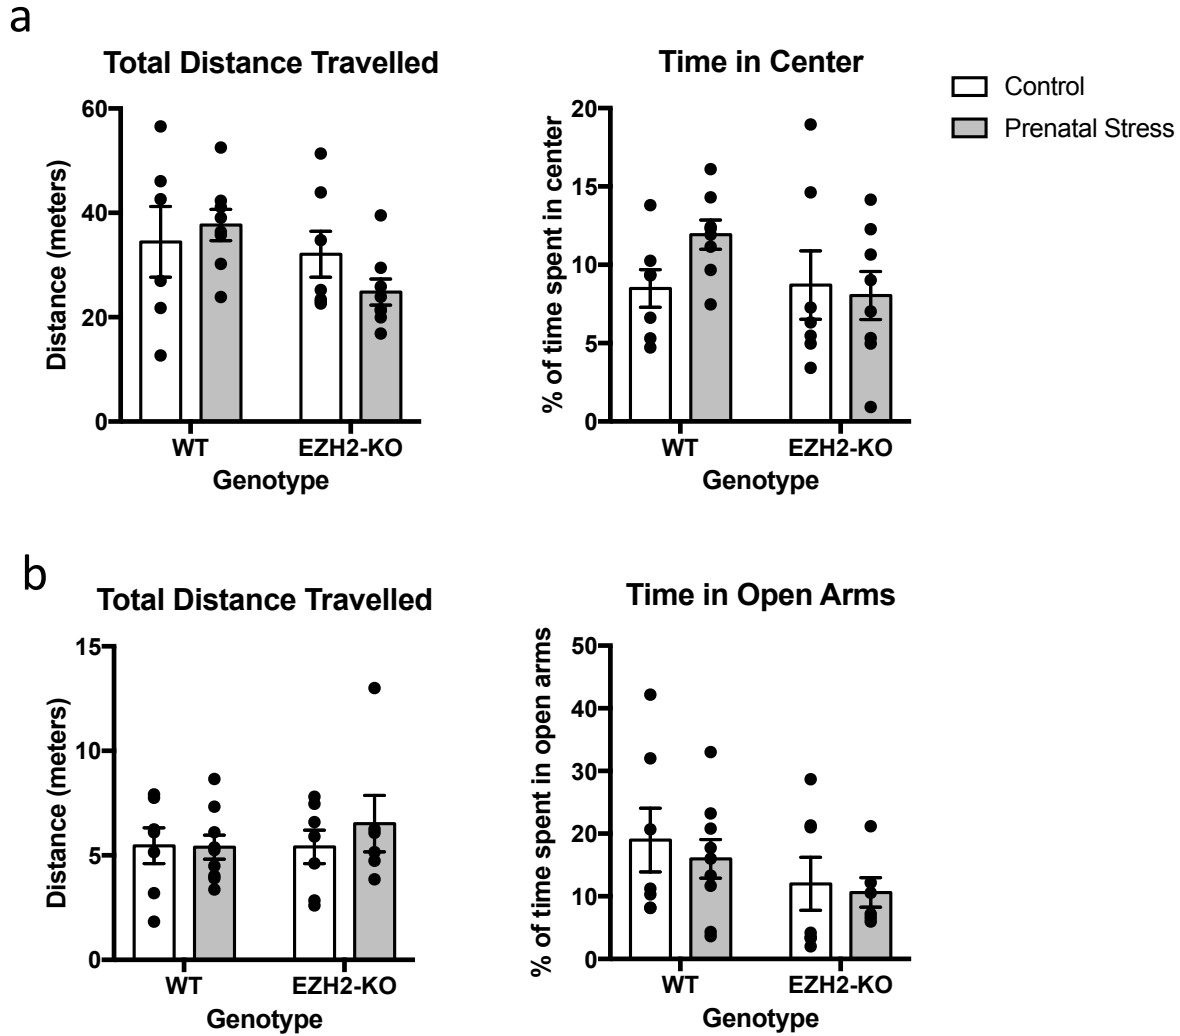

**Supplementary Figure 5. Behavioral validation of trophoblast *Ezh2* knockout female mice.** **a**, We found no significant differences in distance travelled (Two-way ANOVA;  $F_{\text{treatment}(1,25)}=0.238$ ,  $p=0.63$ ;  $F_{\text{genotype}(1,25)}=3.403$ ,  $p=0.07$ ,  $F_{\text{int}(1,25)}=1.605$ ,  $p=0.2169$ ) or percentage of time in the center of the open field arena ( $F_{\text{treatment}(1,25)}=2.667$ ,  $p=0.115$ ;  $F_{\text{genotype}(1,25)}=0.159$ ,  $p=0.693$ ,  $F_{\text{int}(1,25)}=4.23$ ,  $p=0.052$ ) **b**, Similarly, we found no differences in distance travelled ( $F_{\text{treatment}(1,25)}=0.179$ ,  $p=0.675$ ;  $F_{\text{genotype}(1,25)}=2.008$ ,  $p=0.1688$ ,  $F_{\text{int}(1,25)}=0.006$ ,  $p=0.936$ ) or percentage of time in open arms in the elevated plus maze.  $N=7$  Con WT,  $n=9$  PS WT,  $n=7$  Con *Ezh2* KO,  $n=6$  PS *Ezh2* KO from 7 PS and 8 Con litters with a maximum of 2/genotype/litter. Bars represent mean  $\pm$  sem.

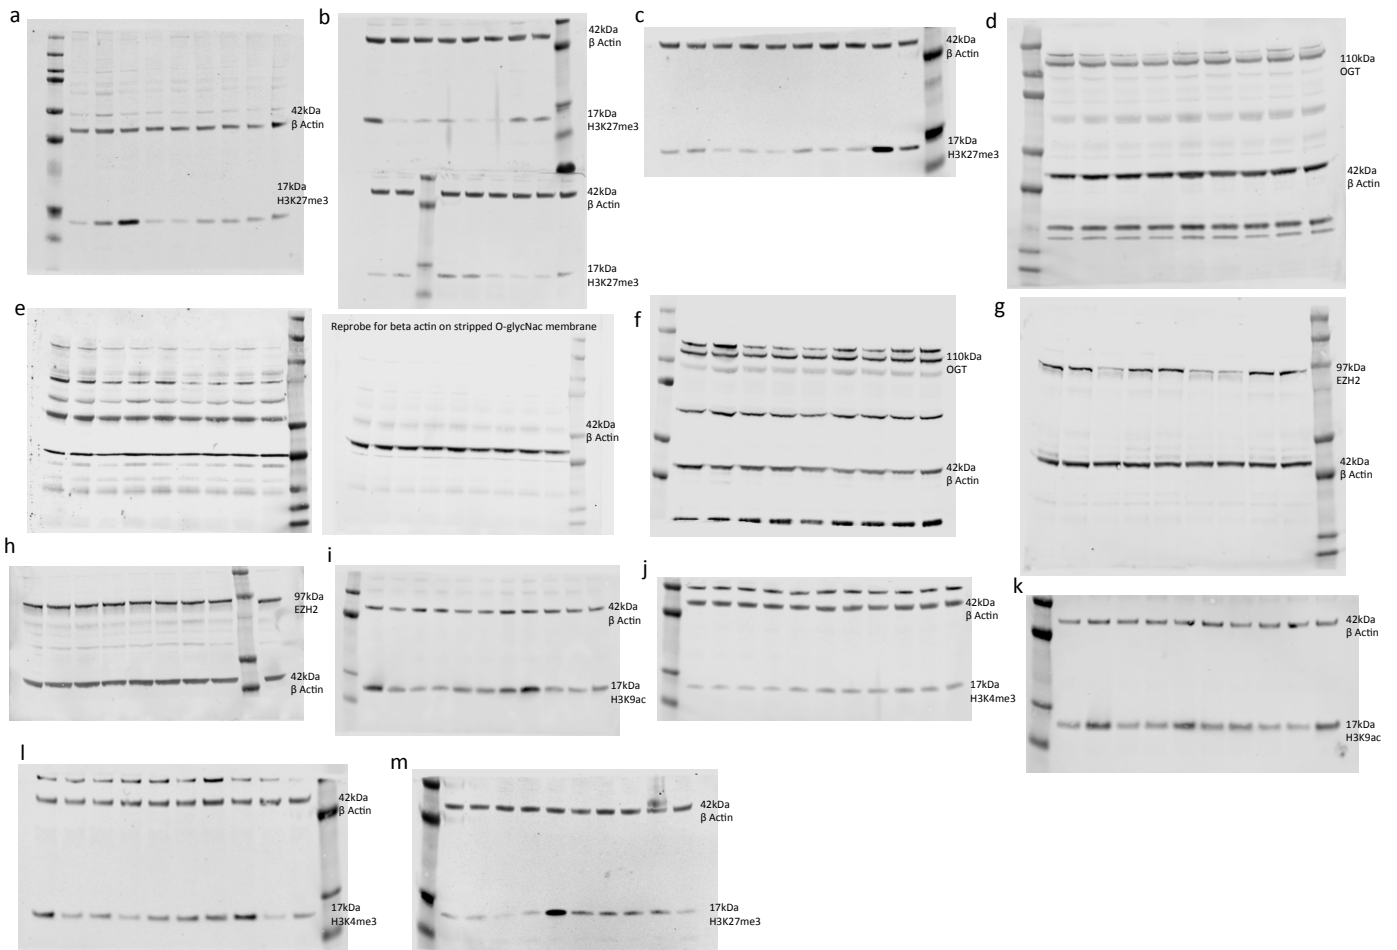

**Supplementary Figure 6. Full Western immunoblot images.** **a**, H3K27me3 in term human placenta (fetal side). **b**, H3K27me3 in E12.5 mouse placenta from trophoblast  $X^{wt}/Y$ ,  $X^{wt}/X^{wt}$  and  $X^{ogt-}/X^{wt}$ . **c**, H3K27me3 in mouse placenta from E12.5 trophoblast WT and *Ezh2* KO females. **d**, OGT in placentas of E12.5 trophoblast  $X^{wt}/X^{wt}$  and  $X^{ogt-}/X^{wt}$  females. **e**, Left: O-glycNAC in placentas of E12.5 trophoblast  $X^{wt}/X^{wt}$  and  $X^{ogt-}/X^{wt}$  females. Right: Beta actin reprobe of membrane used for O-glycNAC quantification. **f**, OGT in brains of trophoblast  $X^{wt}/X^{wt}$  and  $X^{ogt-}/X^{wt}$  females. **g**, EZH2 in placentas of trophoblast WT and *Ezh2* KO E12.5 females. **h**, EZH2 in brains of trophoblast WT and *Ezh2* KO females. **i**, H3K9ac in placentas of E12.5 trophoblast  $X^{wt}/X^{wt}$  and  $X^{ogt-}/X^{wt}$  females. **j**, H3K4me3 in placentas of E12.5 trophoblast  $X^{wt}/X^{wt}$  and  $X^{ogt-}/X^{wt}$  females. **k**, H3K9ac in placentas of E12.5 trophoblast WT and *Ezh2* KO females. **l**, H3K4me3 in placentas of trophoblast WT and *Ezh2* KO E12.5 females. **m**, H3K27me3 in E18.5  $X^{wt}/Y$  and  $X^{wt}/X^{wt}$  mouse placenta.
