# Supplementary material for: Placental H3K27me3 establishes female resilience to prenatal insults
Source: PubMed Central journal article supplement (PMC6028627; doi:10.1038/s41467-018-04992-1), 2018-07-02
Supplement: 41467_2018_4992_MOESM2_ESM.pdf [file 41467_2018_4992_MOESM2_ESM.pdf]

## Description of Additional Supplementary Files

**File Name: Supplementary Data 1**

**Description:** Gene ontology (GO) biological processes enriched in gene sets with sex and Ogt-mediated expression differences from trophoblast-specific RNAseq.

**File Name: Supplementary Data 2**

**Description:** List of genes with significant sex differences in expression which were significantly altered by placental Ogt reduction in females from trophoblastspecific RNA-seq.

**File Name: Supplementary Data 3**

**Description:** List of genes with significant sex differences in expression which were significantly altered by placental Ogt reduction in females from hypothalamic RNA-seq.

**File Name: Supplementary Data 4**

**Description:** List of genes significantly altered by exposure to prenatal stress in females with placental Ezh2 reduction from hypothalamic RNA-seq.

**File Name: Supplementary Data 5**

**Description:** List of hypothalamic genes with coordinated up or down regulation in wt females vs. males/trophoblast Ogt hemizygous and Ezh2 ko control females vs. Ezh2 ko PS females.

**File Name: Supplementary Data 6**

**Description:** List of genes, including chromosome location, altered by trophoblast-specific Ogt reduction from trophoblast-specific RNA-seq.
